# Supplementary material
Source: MDPI journal article supplement (https://www.mdpi.com/2227-9717/9/7/1126)
Supplement: s1 [file s1]

# Iron Based Chitin Composite Films for Efficient Solar Seawater Desalination

Rumeng Zhang<sup>1#</sup>, Xin Li <sup>1#</sup>, Haiquan Xie<sup>1\*</sup>, Lunguang Yao<sup>1,\*</sup>, Liqun Ye<sup>2,\*</sup>

*1. Engineering Technology Research Center of Henan Province for Solar Catalysis;  
School of Life Science and Agricultural Engineering, Nanyang Normal University,  
Nanyang 473061, P. R. China.*

*2. College of Films and Chemical Engineering, Key Laboratory of Inorganic Nonmetallic  
Crystalline and Energy Conversion Films, China Three Gorges University, Yichang  
443002, China*

<sup>#</sup>These authors contributed equally

<sup>\*</sup>Correspondence author: E-mail: lqye@ctgu.edu.cn

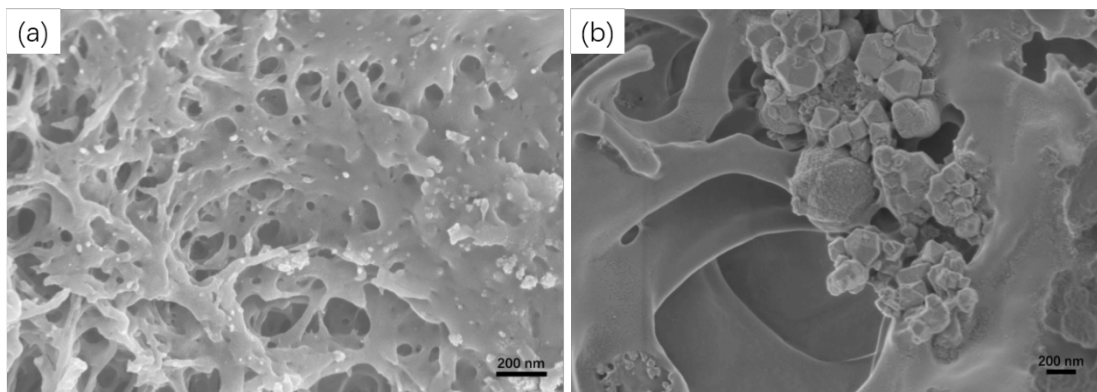

Figure S1 (a) SEM picture after FeS/chitin films applications. (b) SEM picture after Fe<sub>3</sub>O<sub>4</sub>/chitin films applications.
